# Supplementary material
Source: PubMed Central journal article supplement (PMC8097433)

## Supplementary File

### Supplementary Fig Legends

**Fig S1 | AX does not impact *Mtb* survival in 7H9-ADC medium. a-b.** *Rv*, *Rv*Δ*G*, and *Rv*Δ*G*::*G* were inoculated at  $A_{600} \sim 0.05$  in 7H9-ADC media, in the presence and absence of 1mM AX. The bacillary survival was calculated through CFU enumeration at days 0, 3 and 6. **b.** Pictorial representation of the growth of indicated strains in 7H9-ADC at day 0, 3, and 6. Bar depicts mean  $\pm$  SD (n=3), representative of two biologically independent experiments. \*,  $p < 0.05$ ; \*\*,  $p < 0.005$ ; \*\*\*,  $p < 0.0005$ .

**Fig S2 | AX specifically inhibits PknG. a-b.** *Rv*, *Rv*Δ*G*, and *Rv*Δ*G*::*G* were inoculated at  $A_{600} \sim 0.1$  in Sauton's media, in the presence and absence of 1mM AX.  $A_{600}$  was measured on day 0, 2, 4, and 6 **(a)**, and CFUs were enumerated on day 6 **(b)**. **c.** *Rv*, *Rv*Δ*G*, and *Rv*Δ*G*::*G* were inoculated at  $A_{600} \sim 0.1$  in 7H9-ADC media containing methylene blue in the presence and absence of 1mM AX in tightly sealed tubes. CFUs were enumerated on day 20. Bar depicts mean  $\pm$  SD (n=3), representative of two biologically independent experiments. \*,  $p < 0.05$ ; \*\*,  $p < 0.005$ ; \*\*\*,  $p < 0.0005$ .

**Fig S3 | Dose-dependent response of AX against hypoxic and drug-tolerant cells. a.** *Rv*, *Rv* +AX, *Rv*Δ*G*, and *Rv*Δ*G*::*G* were inoculated at  $A_{600} \sim 0.1$  in 7H9-ADC media containing methylene blue in tightly sealed tubes. CFUs were enumerated on day 20. Data is represented as mean  $\pm$  SD of one of two biologically independent experiments, each performed in triplicates (n=3). **b.** *Mtb* strains were inoculated in 7H9-ADS containing 5  $\mu$ g/ml INH. The indicated concentration of AX was added to *Rv* and the CFUs were enumerated on day 0 and 7. The survival obtained at day 0 was normalized to 100% and percent survival at day 7 was calculated with respect to survival at 0 day for each strain. Data is represented as mean percent survival  $\pm$  SD of one of two biologically independent experiments, each performed in triplicates (n=3). Significance is calculated with respect to *Rv*. \*,  $p < 0.05$ ; \*\*,  $p < 0.005$ ; \*\*\*,  $p < 0.0005$ .

**Fig S4 | Adjunct therapy with Ax20017 potentiates the bactericidal activity of BDQ. a.** Antibiotic resistance frequency was determined by plating indicated strains on 7H11-OADC plates containing 1.75  $\mu$ g/ml BDQ. The mutation rate is calculated as the number of colonies obtained on antibiotic-containing plates/number of colonies obtained on the plain plates. The bar diagram represents mean  $\pm$  SD (n=3) and is representative of two independent biological replicates. **b.** *Mtb* strains were inoculated in 7H9-ADS containing 1.75  $\mu$ g/ml BDQ. Survival was monitored at day 0 and 7 and the survival obtained at day 0 was normalized to 100%. Percent survival at day 7 was calculated with respect to survival at 0 day for each strain. Data is represented as mean percent survival  $\pm$  SD of one of three biologically independent experiments, each performed in triplicates

(n=3). Data is representative of two biologically independent experiments, each performed in triplicates. \*,  $p < 0.05$ ; \*\*,  $p < 0.005$ ; \*\*\*,  $p < 0.0005$ .

**Figure S1**

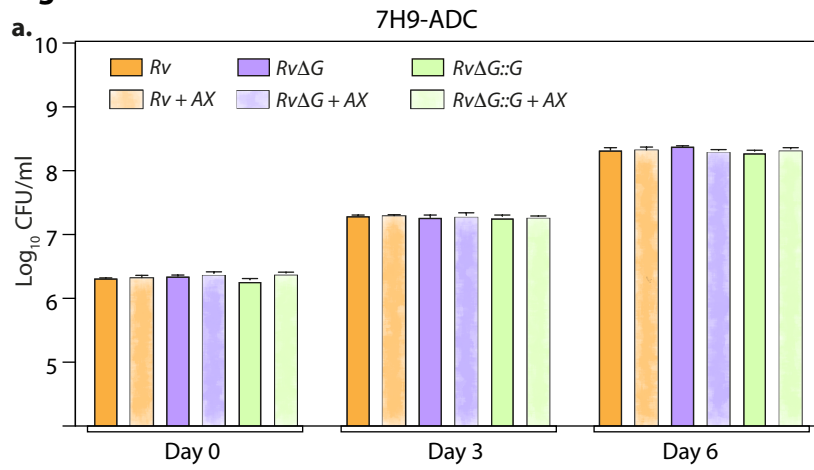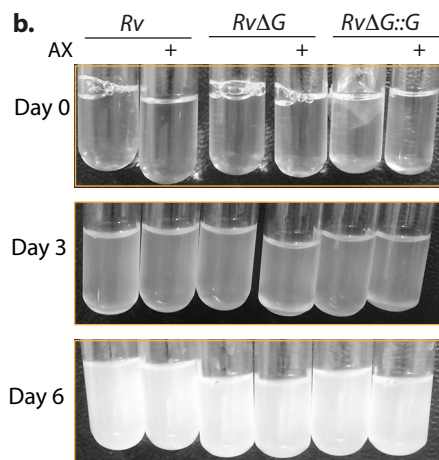

**Figure S2**

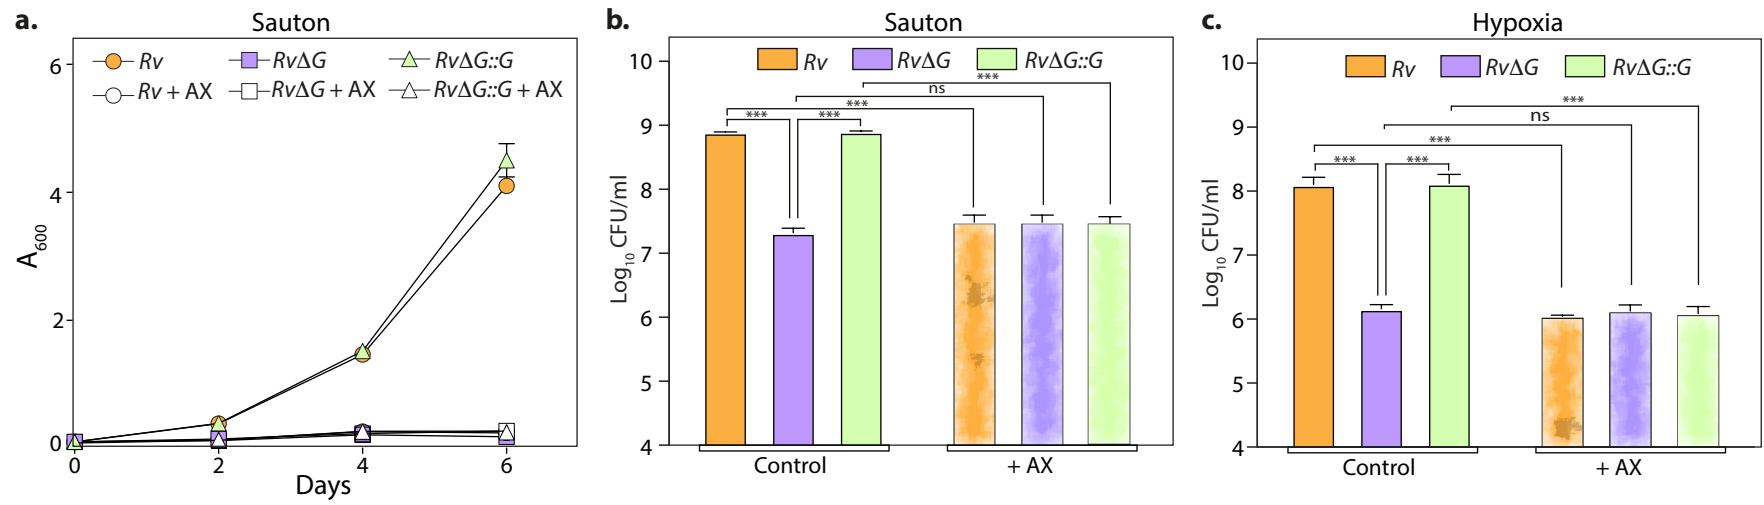

**Figure S3**

**a.**

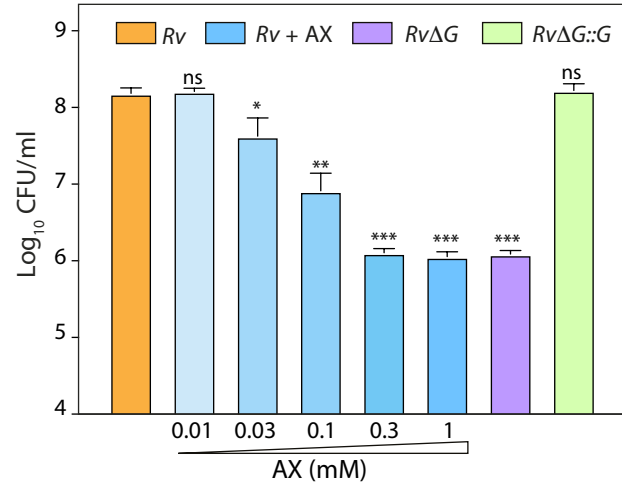

**b.**

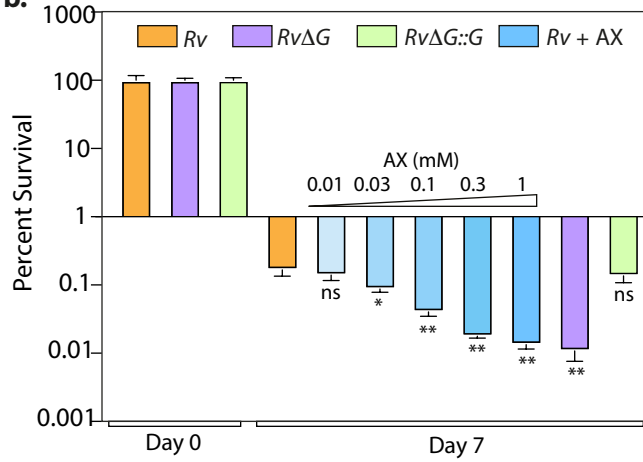

**Figure S4**

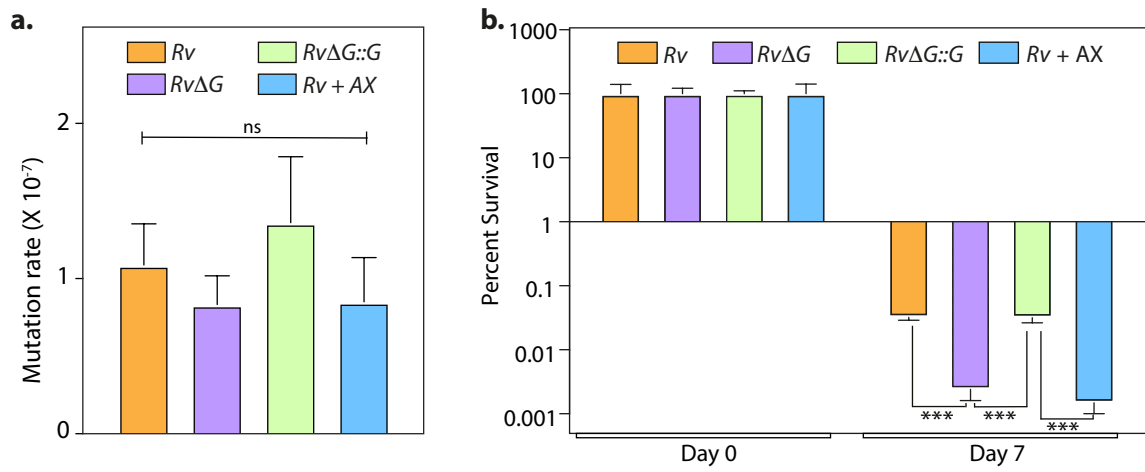

Supplement: AAC.02095-20-s0002.pdf [file AAC.02095-20-s0002.pdf]
